# Supplementary material for: Research Progress in Plant Molecular Systematics of Lauraceae
Source: MDPI journal article supplement (doi:10.3390/biology10050391), 2021-05-01
Supplement: s1 [file s1]

Table S1 Development of Lauraceae Systematics and Classification of Tribes

| classification system                         | Taxonomy character                                     | Tribe division        | Included genera                                                                                                                                                                        |
|-----------------------------------------------|--------------------------------------------------------|-----------------------|----------------------------------------------------------------------------------------------------------------------------------------------------------------------------------------|
| Kostermans' 1957 <sup>[3]</sup>               | Inflorescence traits                                   | Litseeae              | <i>Adenodaphne, Laurus, Lindera, Litsea, Neolitsea</i>                                                                                                                                 |
|                                               |                                                        | Perseeae              | <i>Apollonias, Bilschmied, Dehaasia, Endiandra, Haxapora, Mezilaurus, Persea, Phoebe, Potameia</i>                                                                                     |
|                                               |                                                        | Cinnamoneae           | <i>Actinodaphne, Aiouea, Aniba, Cinnamomum, Dicycellium, Endlicheria, Licaria, Ocotea, Phyllostemonodaphne, Sassafras, Systemonodaphne, Umbellulari, Urbanodendron,</i>                |
|                                               | Cupule structure                                       | Cryptocaryeae         | <i>Cryptocarya, Eusideroxylon, Potoxyton, Ravensara</i>                                                                                                                                |
|                                               |                                                        | Hypodaphnideae        | <i>Hypodaphnis</i>                                                                                                                                                                     |
|                                               |                                                        | Subfam. Cassythoideae | <i>Cassytha</i>                                                                                                                                                                        |
| Van der Werff & Richter's 1996 <sup>[2]</sup> | Wood and bark                                          | Laureae               | <i>Actinodaphne, Litsea, Lindera, Laurus, Sassafras</i>                                                                                                                                |
|                                               |                                                        | Perseeae              | <i>Aniba, Cinnamomum, Dehassia, Licaria, Nectandra, Ocotea, Persea, Pleurothyrium, Phoebe</i>                                                                                          |
|                                               | anatomical structure                                   |                       |                                                                                                                                                                                        |
|                                               | Inflorescence traits                                   | Cryptocaryeae         | <i>Beilschmiedia, Cryptocarya, Endiandra, Potameria, Triadodaphne</i>                                                                                                                  |
| Chanderbail et al.'s 2001 <sup>[1]</sup>      | <i>trnL-trnF, trnT-trnL, psbA-trnH, rpl16, 26S,ITS</i> | Laureae               | <i>Actinodaphne, Adenodaphne, Cinnadenia, Dodecadenia, Laurus, Lindera, Litsea, Neolitsea, Parasassafras, Sassafras</i>                                                                |
|                                               |                                                        | Cinnamomeae           | <i>Aiouea, Aniba, Cinnamomum, Dicycellium, Endlicheria, Kubitzkia, Licaria, Mocinnodaph, Nectandra, Ocotea, Pleurothyrium, Paraia, Rhodostemonodaphne, Umbellularia, Urbanodendron</i> |

|                                               |                                   |                                 |                                                                                                                                                                                                                                                                                                                                                                                                                                                                                                   |
|-----------------------------------------------|-----------------------------------|---------------------------------|---------------------------------------------------------------------------------------------------------------------------------------------------------------------------------------------------------------------------------------------------------------------------------------------------------------------------------------------------------------------------------------------------------------------------------------------------------------------------------------------------|
|                                               |                                   | <i>Persea</i> group             | <i>Alseodaphne, Apollonias, Dehaasia, Machilus, Persea, Phoebe,</i>                                                                                                                                                                                                                                                                                                                                                                                                                               |
|                                               |                                   | <i>Chlorocardium-Mezilaurus</i> | <i>Anaueria, Chlorocardium, Mezilaurus, Sextonia</i>                                                                                                                                                                                                                                                                                                                                                                                                                                              |
|                                               |                                   | Cryptocaryeae                   | <i>Aspidostemon, Beilschmiedia, Cryptocarya, Endiandra, Eusideroxylon, Hypodaphnis, Potameia, Potoxylon,</i>                                                                                                                                                                                                                                                                                                                                                                                      |
| Rohwer &<br>Rudolph's<br>2005 <sup>[23]</sup> | <i>trnK</i> intron                | Laureae                         | <i>Actinodaphne, Laurus, Lindera, Sassafras,</i>                                                                                                                                                                                                                                                                                                                                                                                                                                                  |
|                                               |                                   | Cinnamomeae                     | <i>Aniba, Cinnamomum, Endlicheria, Licaria, Nectandra, Ocotea, Umbellularia,</i>                                                                                                                                                                                                                                                                                                                                                                                                                  |
|                                               |                                   | <i>Persea</i> group             | <i>Alseodaphne, Apollonias, Dehaasia, Persea,</i>                                                                                                                                                                                                                                                                                                                                                                                                                                                 |
|                                               |                                   | <i>Mezilaurus</i> group         | <i>Anaueria, Chlorocardium, Mezilaurus, Sextonia, Williamodendron</i>                                                                                                                                                                                                                                                                                                                                                                                                                             |
|                                               |                                   | <i>Cryptocarya</i> group        | <i>Aspidostemon, Beilschmiedia, Cryptocarya, Endiandra, Eusideroxylon, Potameia</i>                                                                                                                                                                                                                                                                                                                                                                                                               |
| Song et al.'s<br>2020 <sup>[26]</sup>         | Complete<br>chloroplast<br>genome | Laureae                         | <i>Actinodaphne, Aiouea, Alseodaphne, Alseodaphnopsis, Anaueria, Aniba, Apollonias, Chlorocardium, Cinnadenia, Cinnamomum, Damburneya, Dehaasia, Dicypellium, Endlicheria, Iteadaphne, Kubitzkia, Laurus, Licaria, Lindera, Litsea, Machilus, Mezilaurus, Mocinnodaphne, Neolitsea, Nectandra, Nothaphoebe, Ocotea, Paraia, Parasassafras, Persea, Pleurothyrium, Phoebe, Povedadaphne, Rhodostemonodaphne, Sassafras, Sextonia, Sinosassafras, Umbellularia, Urbanodendron, Williamodendron,</i> |
|                                               | Wood and<br>bark                  | Cassytheae                      | <i>Cassytha</i>                                                                                                                                                                                                                                                                                                                                                                                                                                                                                   |
|                                               | anatomical<br>structure           | Neocinnamomeae                  | <i>Neocinnamomum</i>                                                                                                                                                                                                                                                                                                                                                                                                                                                                              |
|                                               |                                   | Caryodaphnopsidae               | <i>Caryodaphnopsis</i>                                                                                                                                                                                                                                                                                                                                                                                                                                                                            |
|                                               | Inflorescence<br>traits           | Cryptocaryeae                   | <i>Aspidostemon, Beilschmiedia, Cryptocarya, Dahlgrenodendron, Endiandra, Eusideroxylon, Potameia, Potoxylon, Ravensara, Sinopora, Syndiclis, Triadodaphne, Yasunia</i>                                                                                                                                                                                                                                                                                                                           |
|                                               |                                   | Hypodaphnideae                  | <i>Hypodaphnis</i>                                                                                                                                                                                                                                                                                                                                                                                                                                                                                |
